# Supplementary material for: Altered Cord Blood Lipid Concentrations Correlate with Birth Weight and Doppler Velocimetry of Fetal Vessels in Human Fetal Growth Restriction Pregnancies
Source: MDPI journal article supplement (doi:10.3390/cells11193110), 2022-10-02
Supplement: s1 [file s1]

**Table S10.** Mean nonesterified fatty acid concentrations (pmol/mg protein) measured in placenta homogenate.

| SGA Controls (n=12) |          |               | FGR (n=8) |              |              |
|---------------------|----------|---------------|-----------|--------------|--------------|
| Free Fatty Acid     | Mean     | 95% CI        | Mean      | 95% CI       | P value      |
| 14:0                | 57.400   | 50.97, 63.83  | 50.904    | 41.19, 60.62 | 0.201        |
| 16:1                | 86.999   | 68.59, 105.41 | 58.518    | 35.04, 81.99 | <b>0.043</b> |
| 16:0                | 1947.423 | 1627, 2267    | 1703.991  | 1253, 2155   | 0.316        |
| 18:3                | 4.460    | 3.54, 5.38    | 2.739     | 1.8, 3.67    | <b>0.011</b> |
| 18:2                | 616.589  | 527, 706      | 561.742   | 386, 737     | 0.492        |
| 18:1                | 514.985  | 432, 598      | 453.230   | 297, 609     | 0.393        |
| 18:0                | 1003.368 | 880, 1127     | 920.123   | 752, 1088    | 0.367        |
| 20:4                | 3387.849 | 2800, 3976    | 3127.627  | 2204, 4052   | 0.575        |
| 20:5                | 38.017   | 29.19, 46.84  | 30.207    | 18.77, 41.65 | 0.231        |
| 22:6                | 267.910  | 188, 348      | 218.607   | 133, 305     | 0.37         |

Normally distributed data analyzed using unpaired t test, presented as mean and 95% CI. **Bold** indicates statistical significance. X:Y nomenclature where X is number of carbon atoms and Y i number of double bonds. Abbreviations: SGA, small for gestational age; FGR, fetal growth restriction; CI, confidence interval
