# Supplementary material for: Altered Cord Blood Lipid Concentrations Correlate with Birth Weight and Doppler Velocimetry of Fetal Vessels in Human Fetal Growth Restriction Pregnancies
Source: MDPI journal article supplement (doi:10.3390/cells11193110), 2022-10-02
Supplement: s1 [file s1]

**Table S5.** Mean nonesterified fatty acid concentrations ( $\mu\text{mol/L}$ ) measured in umbilical vein plasma.

| SGA Controls (n=12) |        |       | FGR (n=7) |       | P value      |
|---------------------|--------|-------|-----------|-------|--------------|
| Free Fatty Acid     | Median | IQR   | Median    | IQR   |              |
| 14:0                | 4.904  | 3.94  | 7.619     | 5.91  | 0.104        |
| 16:1                | 2.457  | 5.59  | 7.586     | 15.02 | 0.059        |
| 16:0                | 52.921 | 35.30 | 86.109    | 20.79 | <b>0.022</b> |
| 18:3                | 0.072  | 0.04  | 0.144     | 0.07  | <b>0.009</b> |
| 18:2                | 17.368 | 19.59 | 41.869    | 28.50 | 0.056        |
| 18:1                | 28.071 | 31.36 | 57.558    | 46.02 | <b>0.036</b> |
| 18:0                | 19.649 | 9.17  | 27.206    | 14.41 | <b>0.022</b> |
| 20:4                | 7.521  | 3.52  | 9.688     | 12.35 | <b>0.013</b> |
| 20:5                | 0.215  | 0.19  | 0.264     | 0.40  | 0.217        |
| 22:6                | 3.044  | 3.40  | 4.353     | 2.86  | 0.142        |

Mann Whitney nonparametric test performed for non-normally distributed data, presented as median and IQR. **Bold** indicates statistical significance. X:Y nomenclature where X is number of carbon atoms and Y is number of double bonds. Abbreviations: SGA, small for gestational age; FGR, fetal growth restriction; IQR, interquartile range
