# Supplementary material for: Altered Cord Blood Lipid Concentrations Correlate with Birth Weight and Doppler Velocimetry of Fetal Vessels in Human Fetal Growth Restriction Pregnancies
Source: MDPI journal article supplement (doi:10.3390/cells11193110), 2022-10-02
Supplement: s1 [file s1]

**Table S3.** Mean lysophosphatidylcholine concentrations ( $\mu\text{mol/L}$ ) measured in umbilical vein plasma.

| SGA Controls (n=12) |               |              | FGR (n=7)     |              |              |
|---------------------|---------------|--------------|---------------|--------------|--------------|
| LPC Compound        | Mean / Median | 95% CI / IQR | Mean / Median | 95% CI / IQR | P value      |
| 16:0-LPC            | 44.766        | 38.00, 51.53 | 34.775        | 20.87, 48.68 | 0.108        |
| 16:1-LPC            | 2.867         | 2.39, 3.34   | 1.860         | 0.73, 2.99   | <b>0.038</b> |
| 18:0-LPC            | 11.42         | 3.25         | 11.762        | 7.13         | 0.34         |
| 18:1-LPC            | 12.677        | 10.63, 14.72 | 9.564         | 4.41, 14.72  | 0.138        |
| 18:2-LPC            | 12.046        | 10.31, 13.78 | 9.271         | 4.59, 13.95  | 0.135        |
| 20:4-LPC            | 9.300         | 7.58, 11.02  | 6.501         | 2.98, 10.02  | 0.078        |
| 20:5-LPC            | 0.010         | 0.03         | 0.000         | 0.004        | 0.08         |
| 22:4-LPC            | 0.096         | 0.06, 0.13   | 0.061         | 0.02, 0.1    | 0.182        |
| 22:5-LPC            | 0.114         | 0.07, 0.15   | 0.049         | 0.01, 0.09   | <b>0.026</b> |
| 22:6-LPC            | 0.400         | 0.2          | 0.246         | 0.214        | <b>0.013</b> |

Mann Whitney nonparametric test performed for non-normally distributed data, presented as median and IQR. Normally distributed data analyzed using unpaired t test, presented as mean and 95% CI. **Bold** indicates statistical significance. X:Y nomenclature where X is number of carbon atoms and Y is number of double bonds in the fatty acid that remains esterified to the glycerol backbone following remodeling of PC compound. Abbreviations: SGA, small for gestational age; FGR, fetal growth restriction; PC, phosphatidylcholine; LPC, lysophosphatidylcholine; CI, confidence interval; IQR, interquartile range
