# Supplementary material for: Altered Cord Blood Lipid Concentrations Correlate with Birth Weight and Doppler Velocimetry of Fetal Vessels in Human Fetal Growth Restriction Pregnancies
Source: MDPI journal article supplement (doi:10.3390/cells11193110), 2022-10-02
Supplement: s1 [file s1]

**Table S9.** Mean eicosanoid concentrations (pmol/mg protein) measured in placenta homogenate.

| SGA Controls (n=11*) |               |              | FGR (n=7*)    |              |         |
|----------------------|---------------|--------------|---------------|--------------|---------|
| Eicosanoid           | Mean / Median | 95% CI / IQR | Mean / Median | 95% CI / IQR | P value |
| 6-keto-PGF1 $\alpha$ | 0.673         | 0.4, 0.94    | 0.542         | 0.33, 0.75   | 0.447   |
| PGF2 $\alpha$        | 0.171         | 0.11         | 0.133         | 0.24         | 0.93    |
| TXB2                 | 0.012         | 0.07         | 0.054         | 0.16         | 0.42    |
| PGD2                 | 0.402         | 0.3, 0.51    | 0.531         | 0.24, 0.83   | 0.263   |
| PGE2                 | 0.346         | 1.45         | 2.826         | 6.49         | 0.659   |
| 5-HETE               | 5.579         | 2.03         | 4.668         | 3.52         | 0.536   |
| 12-HETE              | 15.729        | 19.34        | 14.114        | 8.68         | 0.479   |
| 15-HETE              | 11.386        | 8.54, 14.23  | 13.38         | 8.2, 18.56   | 0.402   |
| 5,6-DiHET            | 0.203         | 0.16, 0.25   | 0.203         | 0.11, 0.3    | 0.985   |
| 8,9-DiHET            | 0.202         | 0.13         | 0.187         | 0.05         | 0.706   |
| 14,15-DiHET          | 0.261         | 0.18, 0.34   | 0.245         | 0.16, 0.33   | 0.757   |
| 11,12-DiHET          | 0.423         | 0.18         | 0.643         | 0.59         | 0.479   |
| 5,6-EET              | 4.046         | 2.04         | 3.813         | 2.58         | 0.659   |
| 8,9-EET              | 3.283         | 2.2, 4.37    | 3.123         | 1.3, 4.95    | 0.854   |
| 11,12-EET            | 2.232         | 1.42, 3.05   | 2.332         | 0.93, 3.74   | 0.879   |
| 14,15-EET            | 1.912         | 0.64         | 1.629         | 1.61         | 0.596   |

Mann Whitney nonparametric test performed for non-normally distributed data, presented as median and IQR. Normally distributed data analyzed using unpaired t test, presented as mean and 95% CI.

Abbreviations: SGA, small for gestational age; FGR, fetal growth restriction; CI, confidence interval; IQR, interquartile range; PG, prostaglandin; TXB, thromboxane; HETE, hydroxyeicosatetraenoic acid; DiHET, dihydroxyeicosatrienoic acid; EET, epoxyeicosatrienoic acid

\*eicosanoid concentrations of one study placenta from each group fell below limits of quantification and were not included in analysis
