# Supplementary material for: Altered Cord Blood Lipid Concentrations Correlate with Birth Weight and Doppler Velocimetry of Fetal Vessels in Human Fetal Growth Restriction Pregnancies
Source: MDPI journal article supplement (doi:10.3390/cells11193110), 2022-10-02
Supplement: s1 [file s1]

**Table S4.** Mean eicosanoid concentrations (pmol/mL) measured in umbilical vein plasma.

| SGA Controls (n=12)  |               |              | FGR (n=7)     |              |               |
|----------------------|---------------|--------------|---------------|--------------|---------------|
| Eicosanoid           | Mean / Median | 95% CI / IQR | Mean / Median | 95% CI / IQR | P value       |
| 6-keto-PGF1 $\alpha$ | 8.311         | 4.44, 12.18  | 7.730         | 3.52, 11.94  | 0.829         |
| PGF2 $\alpha$        | 1.308         | 0.83, 1.79   | 0.972         | 0.55, 1.39   | 0.299         |
| TXB2                 | 3.770         | 4.77         | 5.200         | 11.66        | 0.34          |
| PGD2                 | 0.654         | 0.94         | 0.678         | 1.03         | 0.592         |
| PGE2                 | 7.911         | 9.27         | 6.081         | 9.48         | 0.482         |
| 5-HETE               | 1.969         | 1.56, 2.38   | 3.441         | 1.7, 5.18    | <b>0.022</b>  |
| 12-HETE              | 4.268         | 4.8          | 8.720         | 65.3         | <b>0.028</b>  |
| 15-HETE              | 4.584         | 2.31         | 4.642         | 3.09         | 0.967         |
| 5,6-DiHET            | 0.413         | 0.32, 0.51   | 0.498         | 0.39, 0.61   | 0.221         |
| 8,9-DiHET            | 3.557         | 1.4          | 4.031         | 4.09         | 0.482         |
| 14,15-DiHET          | 2.635         | 2.14, 3.14   | 3.395         | 2.49, 4.3    | 0.08          |
| 11,12-DiHET          | 2.770         | 1.69         | 3.834         | 2.38         | 0.227         |
| 5,6-EET              | 1.015         | 0.87, 1.17   | 1.862         | 1.4, 2.33    | <b>0.0001</b> |
| 8,9-EET              | 0.603         | 0.49, 0.71   | 0.959         | 0.68, 1.24   | <b>0.004</b>  |
| 11,12-EET            | 0.263         | 0.17, 0.36   | 0.684         | 0.38, 0.99   | <b>0.001</b>  |

Mann Whitney nonparametric test performed for non-normally distributed data, presented as median and IQR. Normally distributed data analyzed using unpaired t test, presented as mean and 95% CI. **Bold** indicates statistical significance. Abbreviations: SGA, small for gestational age; FGR, fetal growth restriction; CI, confidence interval; IQR, interquartile range; PG, prostaglandin; TXB, thromboxane; HETE, hydroxyeicosatetraenoic acid; DiHET, dihydroxyeicosatrienoic acid; EET, epoxyeicosatrienoic acid
