# Supplementary material for: Altered Cord Blood Lipid Concentrations Correlate with Birth Weight and Doppler Velocimetry of Fetal Vessels in Human Fetal Growth Restriction Pregnancies
Source: MDPI journal article supplement (doi:10.3390/cells11193110), 2022-10-02
Supplement: s1 [file s1]

**Table S2.** Mean phosphatidylcholine concentrations ( $\mu\text{mol/L}$ ) measured in umbilical vein plasma.

| SGA Controls (n=12) |               |                | FGR (n=7)     |                |              |
|---------------------|---------------|----------------|---------------|----------------|--------------|
| PC Compound         | Mean / Median | 95% CI / IQR   | Mean / Median | 95% CI / IQR   | P value      |
| 16:0_20:4           | 161.126       | 26.04          | 175.676       | 66.71          | 0.482        |
| 16:1_20:4           | 0.012         | 0.124          | 0.404         | 0.5            | <b>0.034</b> |
| O-16:0_20:4         | 7.646         | 6.52, 8.77     | 9.021         | 6.99, 11.05    | 0.153        |
| O-16:1_20:4         | 5.704         | 4.84, 6.57     | 6.677         | 4.9, 8.45      | 0.213        |
| 18:0_20:4           | 139.918       | 127.96, 151.88 | 140.297       | 109.54, 171.05 | 0.975        |
| 18:1_20:4           | 10.368        | 9.33, 11.4     | 12.277        | 8.28, 16.27    | 0.182        |
| 18:2_20:4           | 0.454         | 0.35, 0.56     | 0.827         | 0.17, 1.49     | 0.096        |
| O-18:0_20:4         | 6.095         | 5.33, 6.86     | 7.591         | 6.17, 9.01     | <b>0.03</b>  |
| O-18:1_20:4         | 5.762         | 4.94, 6.59     | 7.388         | 5.66, 9.11     | <b>0.038</b> |
| 16:0_20:5           | 1.836         | 1.06, 2.62     | 2.123         | 0.87, 3.37     | 0.642        |
| O-16:0_20:5         | 0.109         | 0.09, 0.13     | 0.169         | 0.09, 0.25     | <b>0.033</b> |
| O-16:1_20:5         | 0.066         | 0.05, 0.08     | 0.071         | 0.02, 0.12     | 0.773        |
| 18:0_20:5           | 1.077         | 0.57, 1.59     | 0.875         | 0.29, 1.46     | 0.576        |
| O-18:0_20:5         | 0.100         | 0.08, 0.12     | 0.142         | 0.05, 0.23     | 0.171        |
| O-18:1_20:5         | 0.067         | 0.05, 0.08     | 0.096         | 0.03, 0.16     | 0.187        |
| 16:0_22:4           | 3.866         | 3.14, 4.6      | 3.846         | 3.06, 4.63     | 0.968        |
| O-16:0_22:4         | 1.977         | 1.59, 2.37     | 2.233         | 1.7, 2.77      | 0.381        |
| O-16:1_22:4         | 1.110         | 0.89, 1.33     | 1.287         | 0.91, 1.67     | 0.334        |
| 18:0_22:4           | 3.273         | 2.74, 3.81     | 3.355         | 2.87, 3.84     | 0.822        |
| O-18:0_22:4         | 0.476         | 0.4, 0.55      | 0.560         | 0.46, 0.66     | 0.14         |
| O-18:1_22:4         | 0.588         | 0.49, 0.69     | 0.714         | 0.57, 0.86     | 0.108        |
| 16:0_22:5           | 9.227         | 7.56, 10.9     | 7.934         | 5.83, 10.03    | 0.293        |
| O-16:0_22:5         | 0.893         | 0.74, 1.05     | 0.909         | 0.78, 1.04     | 0.876        |
| O-16:1_22:5         | 0.510         | 0.43, 0.59     | 0.586         | 0.44, 0.74     | 0.255        |
| 18:0_22:5           | 5.626         | 4.61, 6.64     | 4.535         | 3.19, 5.88     | 0.158        |
| O-18:0_22:5         | 0.389         | 0.32, 0.46     | 0.446         | 0.32, 0.57     | 0.332        |
| O-18:1_22:5         | 0.437         | 0.35, 0.52     | 0.530         | 0.44, 0.63     | 0.125        |
| 16:0_22:6           | 38.919        | 33.75, 44.09   | 34.427        | 24.60, 44.25   | 0.313        |
| O-16:0_22:6         | 1.063         | 0.89, 1.24     | 1.323         | 1.05, 1.6      | 0.068        |
| O-16:1_22:6         | 0.556         | 0.47, 0.64     | 0.619         | 0.45, 0.79     | 0.406        |
| 18:0_22:6           | 18.558        | 15.62, 21.49   | 15.029        | 9.74, 20.32    | 0.159        |
| O-18:0_22:6         | 0.892         | 0.75, 1.03     | 1.016         | 0.78, 1.26     | 0.279        |
| O-18:1_22:6         | 0.744         | 0.63, 0.86     | 0.788         | 0.55, 1.03     | 0.663        |

Mann Whitney nonparametric test performed for non-normally distributed data, presented as median and IQR. Normally distributed data analyzed using unpaired t test, presented as mean and 95% CI. **Bold** indicates statistical significance. X\_Y nomenclature where X and Y are the fatty acids esterified to either the sn1 or sn2 position. The O denotes an ether linkage. Abbreviations: SGA, small for gestational age; FGR, fetal growth restriction; PC, phosphatidylcholine; CI, confidence interval; IQR, interquartile range
