# Supplementary material for: Altered Cord Blood Lipid Concentrations Correlate with Birth Weight and Doppler Velocimetry of Fetal Vessels in Human Fetal Growth Restriction Pregnancies
Source: MDPI journal article supplement (doi:10.3390/cells11193110), 2022-10-02
Supplement: s1 [file s1]

**Table S7.** Mean phosphatidylcholine concentrations (pmol/mg protein) measured in placenta homogenate.

| SGA Controls (n=12) |          |          | FGR (n=8) |         |         |
|---------------------|----------|----------|-----------|---------|---------|
| PC Compound         | Median   | IQR      | Median    | IQR     | P value |
| 16:0_20:4           | 6255.700 | 10148.78 | 4648.450  | 5741.05 | 0.427   |
| 16:1_20:4           | 17.650   | 73.05    | 4.700     | 37.93   | 0.865   |
| O-16:0_20:4         | 388.700  | 578.93   | 285.100   | 441.03  | 0.521   |
| O-16:1_20:4         | 428.550  | 588.60   | 277.550   | 625.03  | 0.910   |
| 18:0_20:4           | 2582.000 | 3979.70  | 2188.300  | 2830.08 | 0.384   |
| 18:1_20:4           | 1023.100 | 2334.63  | 854.900   | 1746.95 | 0.792   |
| 18:2_20:4           | 454.400  | 978.45   | 346.000   | 1035.05 | 0.792   |
| O-18:0_20:4         | 196.800  | 332.90   | 160.750   | 248.00  | 0.473   |
| O-18:1_20:4         | 329.600  | 696.20   | 226.950   | 592.48  | 0.734   |
| 16:0_20:5           | 0.000    | 8.90     | 0.000     | 0.38    | 0.483   |
| O-16:0_20:5         | 5.300    | 5.90     | 3.750     | 5.10    | 0.613   |
| O-16:1_20:5         | 2.300    | 2.10     | 4.550     | 1.63    | 0.137   |
| 18:0_20:5           | 0.000    | 0.00     | 0.000     | 0.00    | 0.697   |
| O-18:0_20:5         | 5.100    | 6.05     | 3.200     | 4.80    | 0.791   |
| O-18:1_20:5         | 2.700    | 3.45     | 4.000     | 2.15    | 0.613   |
| 16:0_22:4           | 76.700   | 120.58   | 113.100   | 174.20  | 0.507   |
| O-16:0_22:4         | 23.900   | 38.83    | 24.200    | 42.05   | 0.867   |
| O-16:1_22:4         | 15.100   | 34.48    | 16.600    | 30.45   | 0.748   |
| 18:0_22:4           | 23.150   | 59.43    | 49.900    | 86.13   | 0.467   |
| O-18:0_22:4         | 5.350    | 8.63     | 8.400     | 10.05   | 0.415   |
| O-18:1_22:4         | 6.600    | 13.60    | 6.800     | 11.13   | 0.984   |
| 16:0_22:5           | 53.250   | 107.40   | 57.600    | 116.78  | 0.605   |
| O-16:0_22:5         | 21.800   | 20.30    | 14.450    | 31.20   | 0.968   |
| O-16:1_22:5         | 19.100   | 19.30    | 10.400    | 26.20   | 0.968   |
| 18:0_22:5           | 9.200    | 37.55    | 18.550    | 41.90   | 0.552   |
| O-18:0_22:5         | 7.000    | 7.20     | 5.500     | 7.48    | 0.794   |
| O-18:1_22:5         | 9.300    | 13.90    | 7.750     | 18.73   | 0.987   |
| 16:0_22:6           | 140.200  | 339.63   | 109.250   | 250.88  | 0.413   |
| O-16:0_22:6         | 21.050   | 42.25    | 15.050    | 35.40   | 0.427   |
| O-16:1_22:6         | 16.600   | 35.15    | 14.400    | 34.75   | 0.970   |
| 18:0_22:6           | 33.800   | 135.78   | 32.950    | 89.85   | 0.500   |
| O-18:0_22:6         | 13.500   | 22.40    | 8.000     | 14.30   | 0.455   |
| O-18:1_22:6         | 26.300   | 38.90    | 10.800    | 40.58   | 0.640   |

Mann Whitney nonparametric test performed for non-normally distributed data, presented as median and IQR. X\_Y nomenclature where X and Y are the fatty acids esterified to either the sn1 or sn2 position. The O denotes an ether linkage. Abbreviations: SGA, small for gestational age; FGR, fetal growth restriction; PC, phosphatidylcholine; IQR, interquartile range
