# Supplementary material for: Altered Cord Blood Lipid Concentrations Correlate with Birth Weight and Doppler Velocimetry of Fetal Vessels in Human Fetal Growth Restriction Pregnancies
Source: MDPI journal article supplement (doi:10.3390/cells11193110), 2022-10-02
Supplement: s1 [file s1]

**Table S6.** Mean triglyceride concentrations (pmol/mg protein) measured in placenta homogenate.

| SGA Controls (n=12) |         |        | FGR (n=8) |        |              |
|---------------------|---------|--------|-----------|--------|--------------|
| TG Compound         | Median  | IQR    | Median    | IQR    | P value      |
| 48:1                | 0.000   | 3.45   | 11.800    | 17.78  | <b>0.008</b> |
| 48:0                | 16.750  | 21.58  | 35.250    | 26.38  | <b>0.020</b> |
| 50:2                | 94.400  | 60.10  | 93.000    | 103.98 | 0.305        |
| 50:1                | 121.350 | 59.08  | 152.550   | 131.48 | 0.057        |
| 50:0                | 6.850   | 19.20  | 9.950     | 31.53  | 0.294        |
| 52:4                | 6.500   | 35.28  | 6.350     | 83.28  | 0.721        |
| 52:3                | 153.650 | 139.03 | 110.750   | 282.25 | 0.792        |
| 52:2                | 185.400 | 121.93 | 213.900   | 231.05 | 0.270        |
| 52:1                | 35.750  | 37.05  | 43.850    | 42.53  | 0.296        |
| 54:6                | 6.650   | 39.85  | 7.700     | 62.28  | 0.898        |
| 54:5                | 31.400  | 92.35  | 39.950    | 142.83 | 0.717        |
| 54:4                | 21.000  | 75.55  | 37.950    | 117.23 | 0.388        |
| 54:3                | 57.650  | 92.58  | 74.550    | 74.30  | 0.343        |
| 54:2                | 2.700   | 20.50  | 18.500    | 31.05  | 0.115        |
| 56:7                | 15.800  | 54.83  | 12.050    | 76.88  | 0.831        |
| 56:6                | 7.650   | 47.33  | 2.850     | 71.45  | 0.831        |

Mann Whitney nonparametric test performed for non-normally distributed data, presented as median and IQR. **Bold** indicates statistical significance. X:Y nomenclature used where X is total number of carbons on all 3 acyl chains and Y is number of double bonds. Abbreviations: SGA, small for gestational age; FGR, fetal growth restriction; TG, triglyceride; IQR, interquartile range
