# Supplementary material for: Altered Cord Blood Lipid Concentrations Correlate with Birth Weight and Doppler Velocimetry of Fetal Vessels in Human Fetal Growth Restriction Pregnancies
Source: MDPI journal article supplement (doi:10.3390/cells11193110), 2022-10-02
Supplement: s1 [file s1]

**Table S8.** Mean lysophosphatidylcholine concentrations (pmol/mg protein) measured in placenta homogenate.

| SGA Controls (n=12) |               |               | FGR (n=8)     |               |         |
|---------------------|---------------|---------------|---------------|---------------|---------|
| LPC Compound        | Mean / Median | 95% CI / IQR  | Mean / Median | 95% CI / IQR  | P value |
| 16:0-LPC            | 248.650       | 84.13         | 256.700       | 64.23         | 0.401   |
| 16:1-LPC            | 2.483         | 1.21, 3.75    | 2.550         | 1.34, 3.76    | 0.936   |
| 18:0-LPC            | 102.967       | 84.07, 121.87 | 92.975        | 71.83, 114.12 | 0.446   |
| 18:1-LPC            | 64.983        | 52.74, 77.23  | 62.538        | 45.01, 80.06  | 0.791   |
| 18:2-LPC            | 35.742        | 21.05, 50.44  | 35.750        | 12.92, 58.58  | 0.999   |
| 20:4-LPC            | 25.850        | 25.28         | 26.400        | 30.15         | 0.827   |

Mann Whitney nonparametric test performed for non-normally distributed data, presented as median and IQR. Normally distributed data analyzed using unpaired t test, presented as mean and 95% CI. X:Y nomenclature where X is number of carbon atoms and Y is number of double bonds in the fatty acid that remains esterified to the glycerol backbone following remodeling of PC compound. Abbreviations: SGA, small for gestational age; FGR, fetal growth restriction; PC, phosphatidylcholine; LPC, lysophosphatidylcholine; CI, confidence interval; IQR, interquartile range
