# Supplementary material for: Altered Cord Blood Lipid Concentrations Correlate with Birth Weight and Doppler Velocimetry of Fetal Vessels in Human Fetal Growth Restriction Pregnancies
Source: MDPI journal article supplement (doi:10.3390/cells11193110), 2022-10-02
Supplement: s1 [file s1]

**Table S1.** Mean triglyceride concentrations ( $\mu\text{mol/L}$ ) measured in umbilical vein plasma.

| SGA Controls (n=12) |               |              | FGR (n=7)     |               |               |
|---------------------|---------------|--------------|---------------|---------------|---------------|
| TG Compound         | Mean / Median | 95% CI / IQR | Mean / Median | 95% CI / IQR  | P value       |
| 48:3                | 0.075         | 0.29         | 0.892         | 1.34          | <b>0.007</b>  |
| 48:2                | 2.7           | 1.7          | 6.17          | 8.44          | <b>0.02</b>   |
| 48:1                | 5.522         | 3.08         | 9.968         | 11.02         | <b>0.02</b>   |
| 48:0                | 2.943         | 1.54         | 5.812         | 3.96          | <b>0.0008</b> |
| 50:4                | 0.912         | 0.88         | 2.844         | 2.99          | <b>0.04</b>   |
| 50:3                | 7.831         | 4.59         | 17.586        | 17.24         | <b>0.005</b>  |
| 50:2                | 21.287        | 11.21        | 40.008        | 43.2          | <b>0.01</b>   |
| 50:1                | 20.022        | 10.41        | 27.706        | 21.32         | <b>0.002</b>  |
| 50:0                | 2.215         | 1.44         | 3.348         | 2.152         | 0.08          |
| 52:5                | 2.463         | 1.73, 3.2    | 5.191         | 2.14, 8.24    | <b>0.017</b>  |
| 52:4                | 11.59         | 8.59, 14.59  | 28.465        | 16.28, 40.65  | <b>0.001</b>  |
| 52:3                | 29.982        | 21.89, 38.08 | 68.581        | 39.83, 97.33  | <b>0.001</b>  |
| 52:2                | 38.231        | 25.37, 51.1  | 72.49         | 35.02, 109.96 | <b>0.024</b>  |
| 52:1                | 6.475         | 4.79, 8.17   | 11.034        | 3.42, 18.65   | 0.09          |
| 52:0                | 1.02          | 0.83, 1.21   | 1.273         | 0.77, 1.78    | 0.203         |
| 54:6                | 4.891         | 3.57, 6.21   | 11.351        | 6.18, 16.52   | <b>0.002</b>  |
| 54:5                | 8.828         | 6.71, 10.95  | 18.523        | 11.09, 25.96  | <b>0.002</b>  |
| 54:4                | 9.58          | 6.86, 12.30  | 20.489        | 12.95, 28.03  | <b>0.001</b>  |
| 54:3                | 11.343        | 8.35, 14.34  | 20.85         | 13.02, 28.68  | <b>0.006</b>  |
| 54:2                | 4.243         | 3.15, 5.33   | 8.087         | 3.19, 12.98   | <b>0.031</b>  |
| 54:1                | 0.163         | 0.06, 0.27   | 0.419         | -0.11, 0.94   | 0.154         |
| 56:7                | 4.261         | 3.07, 5.45   | 8.003         | 4.52, 11.49   | <b>0.009</b>  |
| 56:6                | 2.418         | 1.47, 3.37   | 4.807         | 2.25, 7.36    | <b>0.024</b>  |
| 56:5                | 0.236         | 0.10, 0.38   | 1.086         | 0.14, 2.03    | <b>0.012</b>  |

Mann Whitney nonparametric test performed for non-normally distributed data, presented as median and IQR. Normally distributed data analyzed using unpaired t test, presented as mean and 95% CI. **Bold** indicates statistical significance. X:Y nomenclature used where X is total number of carbons on all 3 acyl chains and Y is number of double bonds. Abbreviations: SGA, small for gestational age; FGR, fetal growth restriction; TG, triglyceride; CI, confidence interval; IQR, interquartile range
